# Supplementary material for: Germline RBBP8 variants associated with early-onset breast cancer compromise replication fork stability
Source: JCI journal article supplement (doi:10.1172/jci127521), 2020-05-07
Supplement: sd1 [file 1]

# Supplementary Figure 1.

- Sequencing of 129 breast and/or ovarian cancer patients
- 124 females, 5 males
- Females < 35 years at the time of diagnosis

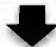

- Filtering for rare nonsynonymous variants in *RBBP8*
- Comparing allele frequencies to 2000 Danes and ExAC

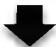

**Enrichment of rare *RBBP8* variants in early breast cancer patients**

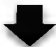

- Sequencing of 1092 patients:
  - Mainly breast, as well as ovarian and other HBOC related cancer patients
  - Moreover unaffected family members of HBOC probands

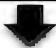

**Enrichment of rare *RBBP8* variants in early breast cancer patients**

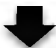

- Functional analysis and characterization of identified *RBBP8* variants

## Supplementary Figure 1

Work flow used to screen for identification of rare *RBBP8*-variants.

## Supplementary Figure 2.

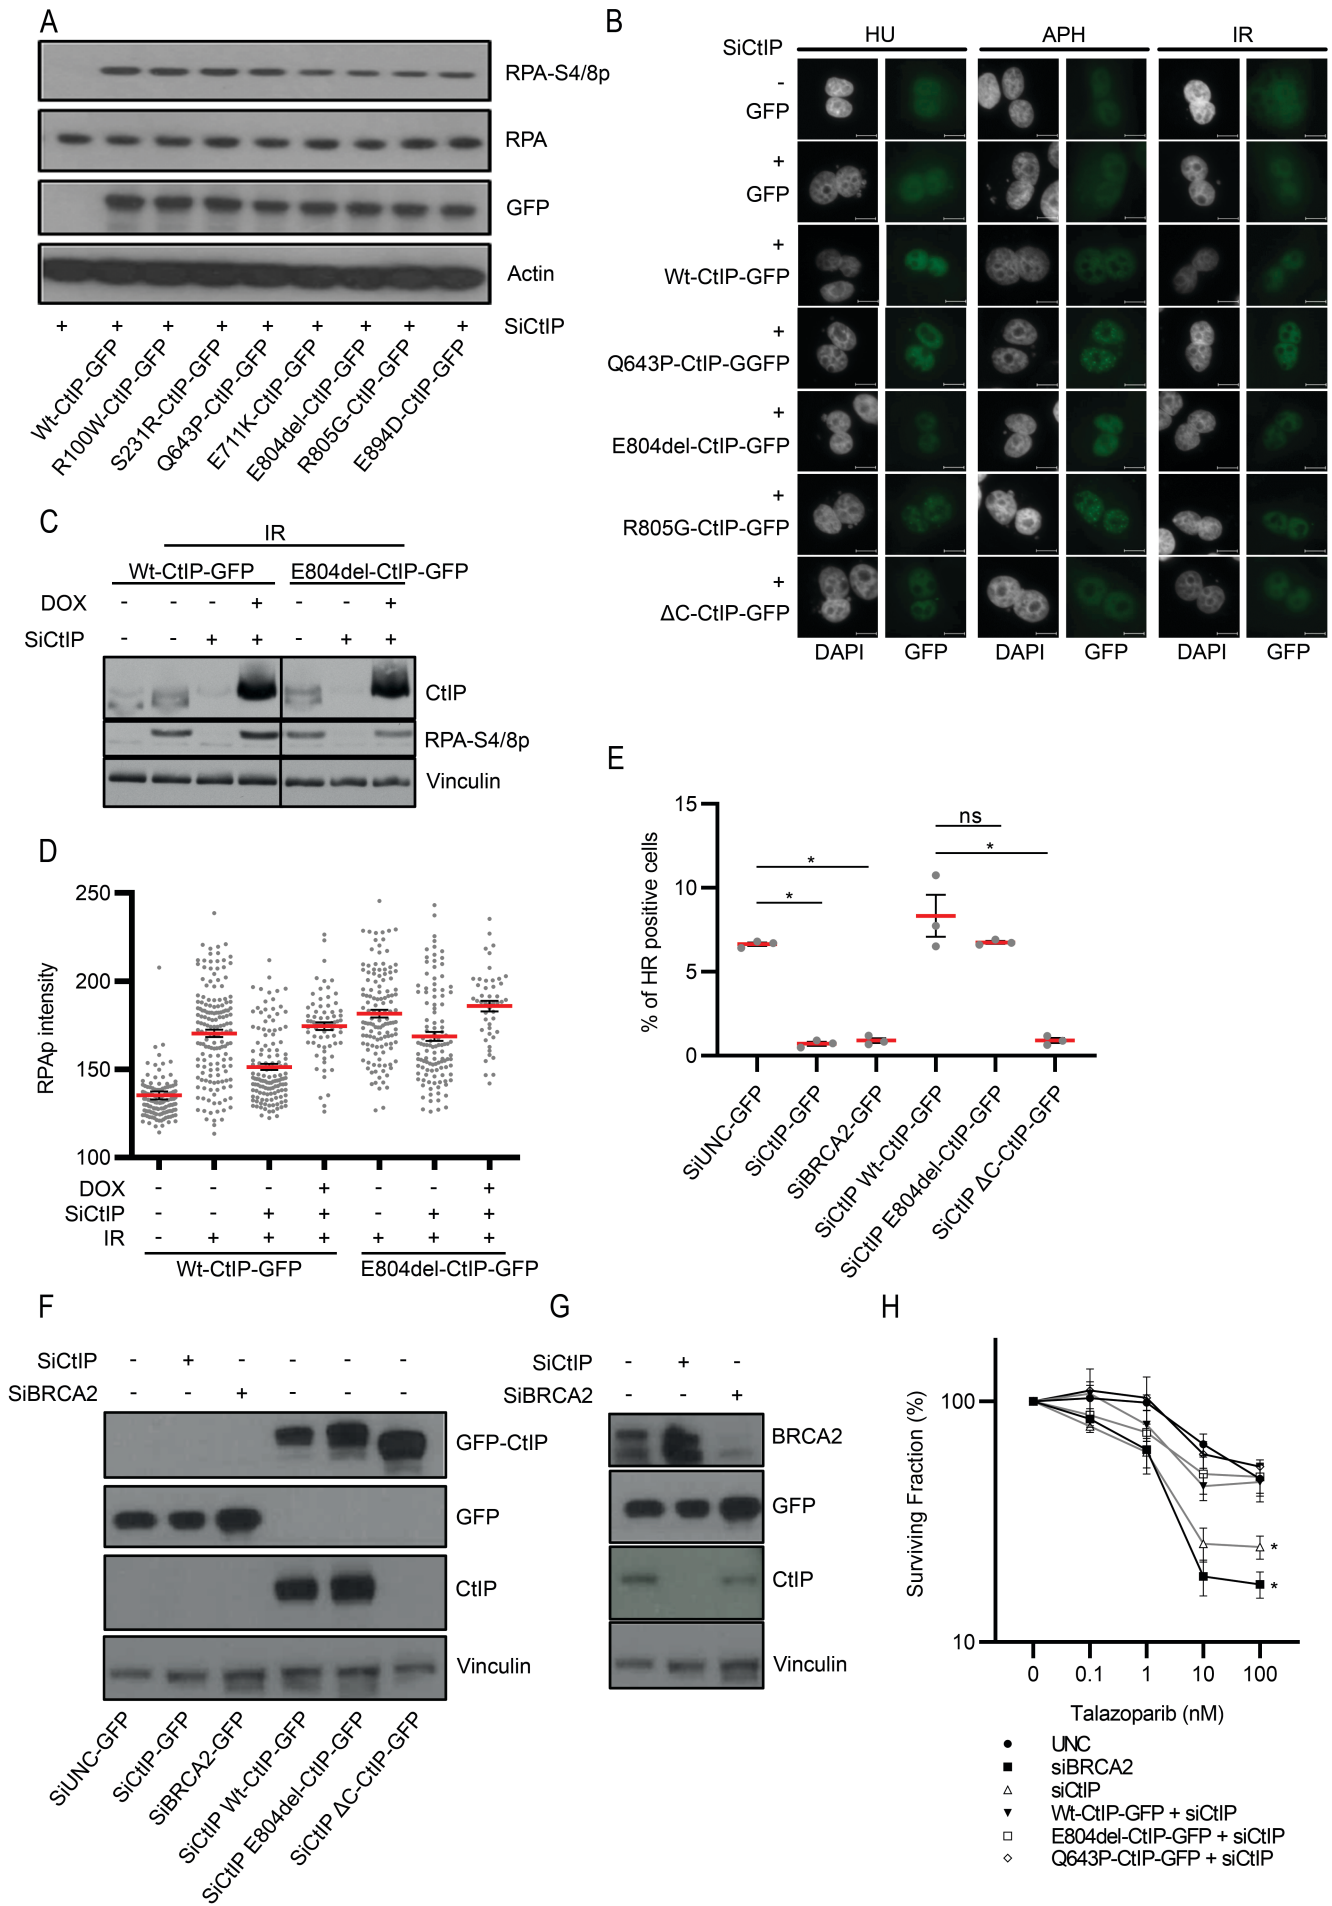

## Supplementary Figure 2

(A) MCF7 cells were transfected with the indicated siRNA followed by transfection of Wt or mutant CtIP. Cells were harvested 3 h post-irradiation with 15 Gy and western blots were performed with the indicated antibodies. (B) Representative images displaying micronuclei. MCF7 cells were transfected with the indicated siRNA followed by transfection of Wt or mutant CtIP. Cells were treated with IR, APH or HU and Cytochalasin B. (C) DOX-inducible U-2-OS cell lines were transfected with the indicated siRNA and 24 h later, DOX was added for 24 h, cells were harvested 3 h post-irradiation with 15 Gy. Western blots were performed with the indicated antibodies. Samples were run on the same gel, but were non-contiguous. (D) The relative intensity of pRPA (S4/8) was examined in Wt and E804del expressing cell lines treated as in (C). Cells were imaged with a 20x objective on a Scan<sup>R</sup> workstation (Olympus); mean relative pRPA (S4/8) intensity was calculated from background subtracted images using the Scan<sup>R</sup> analysis software. Per sample  $n \geq 48$  nuclei were analyzed. (E) Homologous recombination activity was analyzed in U-2-OS cells transfected with the indicated siRNA. The next day, a reporter sgRNA targeting *LMNA* and a plasmid with homology arms towards Lamin A and mRuby together with empty vector, Wt, or CtIP variants were transfected. After 48 h cells were fixed and mRuby-tagged LMNA was monitored by microscopy. Three independent biological replicates were performed. Holm-corrected multiple testing was performed of ranked data fitted by a linear mixed model. (F-G) Western blot analysis of samples shown in (E). (H) DOX-inducible U-2-OS cell lines were transfected with the indicated siRNA and treated with DMSO and PARPi. 5 days post transfection, cell viability was measured using CellTiter-Glo. Surviving fractions were calculated relative to DMSO-exposed cells for each PARPi concentration. Data represent three independent biological replicates. Holm-corrected multiple testing was performed of Johnson-transformed data fitted by a linear mixed model.

# Supplementary Figure 3.

A

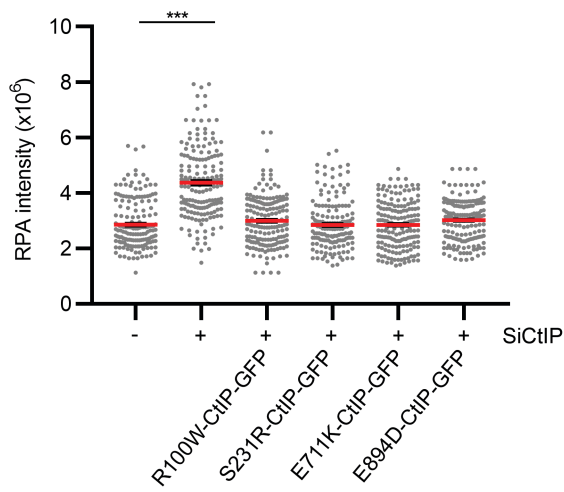

B

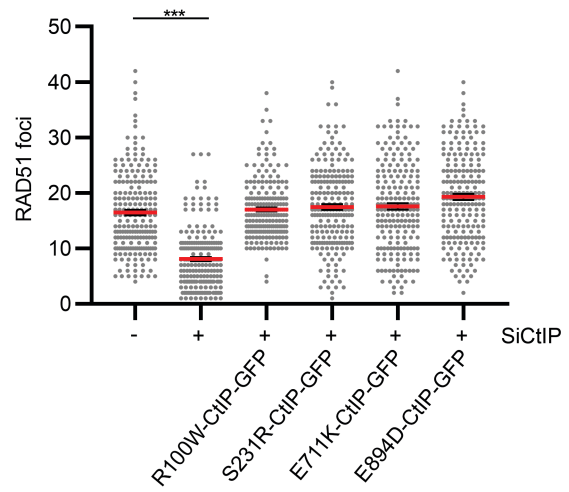

C

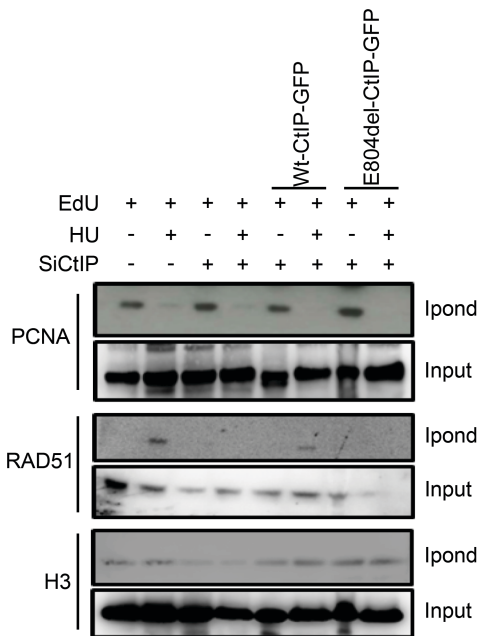

D

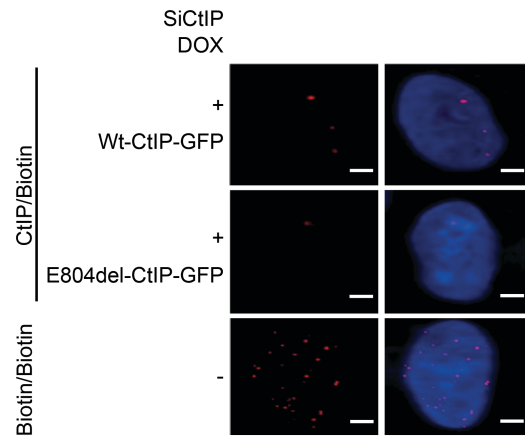

E

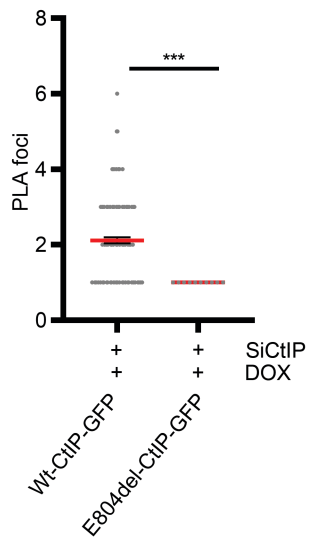

### Supplementary Figure 3

(A) MCF7 cells were transfected with the indicated siRNA and 24 h later, cells were transfected with mutant CtIP variants. Cells were pulsed with EdU and exposed to 4 mM HU for 5 h. Cells in S phase (EdU+) at the time of HU treatment were Click-IT labeled with an Alexa Fluor 594 azide and RPA intensity in EdU-positive cells were enumerated using Image J/Fiji. Representative data of three independent biological replicates, per sample  $n \geq 172$  were analyzed. Holm-corrected multiple testing was performed of ranked data fitted by a linear mixed model. (B) MCF7 cells were transfected with the indicated siRNA and 24 h later, cells were transfected with mutant CtIP variants. Afterwards cells were pulsed with 10  $\mu$ M EdU for 20 min prior to addition of 4 mM HU. Cells in S phase (EdU+) at the time of HU treatment were Click-IT labeled with an Alexa Fluor 594 azide and RAD51 foci in EdU-positive cells were enumerated using Image J/Fiji. Representative data of three independent biological replicates, per sample  $n \geq 207$  were analyzed. Statistical testing was performed as described in (A). (C) Western blot of iPOND samples in DOX-inducible U-2-OS cell lines. Cells were transfected with both UNC (negative control) or CtIP siRNA and 24 h later, cells were induced with DOX for 24 h. (D) Representative images of PLA foci obtained from HU-treated U-2-OS cell lines. DOX-inducible U-2-OS cells were transfected with the indicated siRNAs and 24 h later, cells were induced with DOX for 24 h. Scale bar= 20  $\mu$ m. (E) CtIP/Biotin PLA foci per cell in HU-treated DOX-inducible U-2-OS cells. Representative data of three independent biological replicates, per sample  $n \geq 10$  were analyzed. A linear mixed model of the ranked data was fitted and the p value for differences of least squares means calculated.

# Supplementary Figure 4.

A

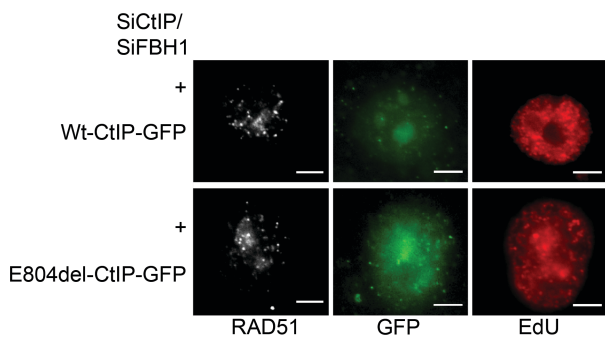

B

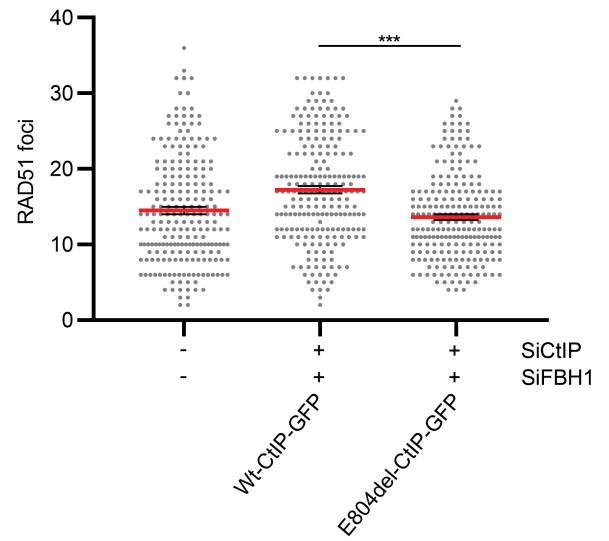

C

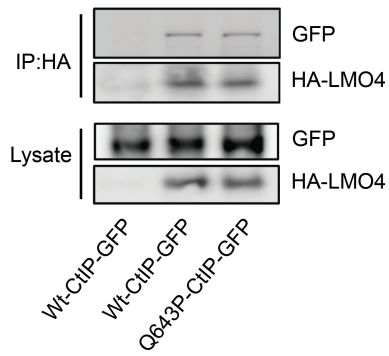

#### **Supplementary Figure 4**

(A) Representative images displaying RAD51 in HU-treated EdU-positive cells. Scale bar= 20  $\mu$ m. (B) MCF7 cells were transfected with the indicated siRNA and 24 h later, cells were transfected with Wt or mutant E804del variant. Cells were pulsed with EdU and exposed to HU as in (A). Cells in S phase (EdU+) at the time of HU treatment were Click-IT labeled with an Alexa Fluor 594 azide and RAD51 foci in EdU positive cells were enumerated using Image J/Fiji. The data represents three independent biological replicates, per sample  $n \geq 223$  were analyzed. Holm-corrected multiple testing was performed of ranked data fitted by a linear mixed model. (C) MCF7 cells, transfected with HA-tagged LMO4, Wt or mutated Q643P plasmids, were harvested for immunoprecipitation 24 h post-transfection, using HA antibody. Immunoprecipitation of HA in total cell lysates from MCF7 cells transfected with Wt and Q643P-CtIP-GFP, followed by a Western blot, using HA or GFP.



Supplementary Table 1. Cohort description.

| Diagnose | Gender (M/F) | Age (time of diagnosis) | WHO Diagnosis | Surgical procedure | Positive lymph nodes | Tumor Size (mm) | IHC Grading | Family history (Any 1. or 2. degree relative with BC or OC) |
|----------|--------------|-------------------------|---------------|--------------------|----------------------|-----------------|-------------|-------------------------------------------------------------|
| BC       | F            | 32                      | IDC           | Lumpectomy         | 8                    | 56              | 3           | Y                                                           |
| BC       | F            | 32                      | IDC           | Mastectomy         | 1                    | 25              | 3           | N                                                           |
| BC       | F            | 28                      | N/A           | N/A                | N/A                  | N/A             | N/A         | Y                                                           |
| BC       | F            | 30                      | IDC           | Mastectomy         | 0                    | N/A             | 3           | Y                                                           |
| BC       | F            | 23                      | IDC           | Lumpectomy         | 0                    | 15              | 2           | N                                                           |
| BC       | F            | 22                      | IDC           | Lumpectomy         | 0                    | 16              | 2           | N                                                           |
| BC       | F            | 26                      | IDC           | Mastectomy         | 1                    | 13              | 3           | N                                                           |
| BC       | F            | 28                      | IDC           | Lumpectomy         | 0                    | 11              | 3           | Y                                                           |
| BC       | F            | 31                      | IDC           | Mastectomy         | 4                    | 20              | 3           | N                                                           |
| BC       | F            | 34                      | IDC           | Mastectomy         | 0                    | N/A             | Unfit       | N                                                           |
| BC       | F            | 24                      | IDC           | Mastectomy         | 5                    | 31              | 3           | Y                                                           |
| BC       | F            | 35                      | IDC           | Mastectomy         | 4                    | 75              | 1           | Y                                                           |
| BC       | F            | 30                      | IDC           | Mastectomy         | 0                    | 15              | 2           | Y                                                           |
| BC       | F            | 35                      | IDC           | Mastectomy         | 7                    | 16              | 3           | N                                                           |
| BC       | F            | 35                      | IDC           | Mastectomy         | 1                    | 38              | 2           | N                                                           |
| BC       | F            | 34                      | IDC           | Lumpectomy         | 0                    | 11              | 3           | N                                                           |
| BC       | F            | 30                      | IDC           | Lumpectomy         | 0                    | 15              | 3           | N                                                           |
| BC       | F            | 33                      | IDC           | Lumpectomy         | 0                    | 11              | 3           | N                                                           |
| BC       | F            | 28                      | IDC           | Mastectomy         | 7                    | 18              | 3           | Y                                                           |
| BC       | F            | 30                      | IDC           | Lumpectomy         | 4                    | 35              | 2           | Y                                                           |
| BC       | F            | 35                      | IDC           | Mastectomy         | 0                    | 20              | 3           | N                                                           |
| BC       | F            | 22                      | IDC           | Mastectomy         | 0                    | 20              | 1           | N                                                           |
| OC       | F            | 28                      | N/A           | N/A                | N/A                  | N/A             | N/A         | Y                                                           |
| BC       | F            | 34                      | IDC           | Lumpectomy         | 1                    | 13              | 2           | Y                                                           |
| BC       | F            | 28                      | IDC           | Mastectomy         | 1                    | 17              | 1           | Y                                                           |
| BC       | F            | 30                      | IDC           | Mastectomy         | 11                   | 19              | 2           | N                                                           |
| BC       | F            | 31                      | IDC           | Lumpectomy         | 0                    | 25              | 2           | Y                                                           |
| BC       | F            | 34                      | IDC           | Mastectomy         | N/A                  | N/A             | N/A         | N                                                           |
| BC       | F            | 30                      | IDC           | Mastectomy         | 4                    | 60              | 2           | N/A                                                         |
| BC       | F            | 34                      | IDC           | Lumpectomy         | 3                    | 19              | 2           | N                                                           |
| BC/OC    | F            | 32                      | N/A           | N/A                | N/A                  | N/A             | N/A         | Y                                                           |
| BC       | F            | 28                      | N/A           | N/A                | N/A                  | N/A             | N/A         | Y                                                           |
| OC       | F            | 30                      | N/A           | N/A                | N/A                  | N/A             | N/A         | N                                                           |
| BC       | F            | 29                      | IDC           | Lumpectomy         | 0                    | 12              | 3           | N                                                           |
| BC       | F            | 32                      | IDC           | Mastectomy         | 11                   | 40              | 3           | Y                                                           |
| BC       | F            | 24                      | IDC           | Lumpectomy         | 0                    | 15              | 3           | Y                                                           |
| BC       | F            | 26                      | IDC           | Mastectomy         | 4                    | 40              | 3           | N                                                           |
| BC       | F            | 30                      | IDC           | Mastectomy         | 2                    | 55              | N/A         | Y                                                           |
| BC       | F            | 31                      | IDC           | Mastectomy         | 18                   | 40              | 2           | N                                                           |
| BC       | F            | 29                      | IDC           | Mastectomy         | 0                    | 9               | 3           | Y                                                           |
| BC       | F            | 33                      | ILC           | Mastectomy         | 2                    | 37              | N/A         | Y                                                           |
| BC       | F            | 34                      | IDC           | Lumpectomy         | 1                    | 9               | 1           | N                                                           |
| BC       | F            | 32                      | IDC           | Lumpectomy         | 1                    | N/A             | 2           | N                                                           |

|         |   |    |              |            |     |     |       |   |
|---------|---|----|--------------|------------|-----|-----|-------|---|
| BC      | F | 24 | CIS          | Mastectomy | N/A | N/A | N/A   | Y |
| BC      | F | 31 | IDC          | Lumpectomy | 1   | 25  | 2     | N |
| BC      | F | 28 | IDC          | Lumpectomy | 0   | 15  | 2     | N |
| BC      | F | 28 | IDC          | Mastectomy | 0   | 30  | 2     | N |
| BilatBC | F | 32 | ILC          | Mastectomy | 12  | 40  | 2     | Y |
| BC      | F | 32 | IDC          | Mastectomy | 2   | 18  | 2     | N |
| BC      | F | 26 | N/A          | N/A        | N/A | N/A | N/A   | Y |
| BC      | F | 31 | Unclassified | Lumpectomy | 2   | N/A | N/A   | Y |
| BC      | F | 32 | IDC          | Lumpectomy | 0   | 12  | 2     | Y |
| BC      | F | 30 | CIS          | Mastectomy | 0   | 30  | N/A   | Y |
| BC      | F | 35 | IDC          | Mastectomy | 0   | 20  | 3     | Y |
| BC      | F | 31 | IDC          | Mastectomy | 1   | 15  | 3     | N |
| BC      | F | 30 | N/A          | N/A        | N/A | N/A | N/A   | N |
| BC      | F | 34 | IDC          | Lumpectomy | 0   | 30  | 3     | N |
| BC      | F | 32 | IDC          | Mastectomy | 12  | 28  | 3     | Y |
| BC      | F | 32 | IDC          | Lumpectomy | 1   | 24  | 2     | N |
| BC      | F | 34 | N/A          | N/A        | N/A | N/A | N/A   | Y |
| BC      | F | 30 | IDC          | Lumpectomy | 0   | 18  | N/A   | Y |
| OC      | F | 30 | N/A          | N/A        | N/A | N/A | N/A   | Y |
| BC      | F | 32 | IDC          | Lumpectomy | 0   | 14  | 3     | Y |
| BC      | F | 27 | IDC          | Mastectomy | 2   | 50  | 3     | N |
| BC      | F | 32 | Medullary    | Lumpectomy | 0   | 15  | N/A   | Y |
| BC      | F | 28 | IDC          | Mastectomy | 7   | 40  | 3     | N |
| BC      | F | 35 | IDC          | Mastectomy | 10  | 25  | 3     | Y |
| BC      | F | 30 | IDC          | Mastectomy | 0   | 20  | 3     | Y |
| BC      | F | 31 | IDC          | Lumpectomy | 0   | 20  | 3     | N |
| BC      | F | 29 | N/A          | Biopsy     | N/A | N/A | N/A   | Y |
| BC      | F | 31 | IDC          | Lumpectomy | 0   | 6   | 2     | N |
| BC      | F | 35 | IDC          | Lumpectomy | 0   | 7   | 1     | Y |
| BC      | F | 31 | IDC          | Mastectomy | 0   | 8   | 2     | N |
| BC      | F | 31 | IDC          | Lumpectomy | 0   | 10  | 3     | N |
| BC      | F | 30 | IDC          | Lumpectomy | 0   | 18  | 3     | Y |
| BC      | F | 28 | IDC          | Mastectomy | 1   | 26  | 3     | N |
| BC      | F | 27 | IDC          | Mastectomy | 0   | 75  | 3     | Y |
| BC      | F | 28 | N/A          | N/A        | N/A | N/A | N/A   | N |
| BC      | F | 28 | IDC          | Lumpectomy | 3   | 30  | 3     | N |
| BC      | F | 30 | IDC          | Mastectomy | 5   | 12  | 3     | Y |
| BC      | F | 28 | N/A          | N/A        | N/A | N/A | N/A   | N |
| BC      | F | 34 | IDC          | Mastectomy | 0   | 14  | 3     | N |
| BC      | F | 28 | IDC          | Mastectomy | 0   | 10  | 2     | Y |
| BC      | F | 27 | IDC          | Lumpectomy | 0   | 30  | 3     | Y |
| BC      | F | 31 | IDC          | Mastectomy | 23  | 15  | 2     | N |
| BC      | F | 31 | IDC          | Mastectomy | 2   | 40  | 2     | Y |
| OC      | F | 27 | N/A          | N/A        | N/A | N/A | N/A   | Y |
| BC      | F | 29 | IDC          | Mastectomy | 0   | 5   | 3     | N |
| BC      | F | 33 | IDC          | Lumpectomy | 0   | 15  | 1     | Y |
| BC      | F | 34 | IDC          | Lumpectomy | 0   | 16  | 2     | N |
| BC      | F | 32 | IDC          | Mastectomy | 11  | 25  | 2     | N |
| BC      | F | 31 | IDC          | Lumpectomy | 2   | 24  | 3     | Y |
| BC      | F | 32 | IDC          | Biopsy     | 1   | N/A | Unfit | Y |
| BC      | F | 33 | IDC          | Mastectomy | 0   | 8   | 2     | Y |
| BC      | F | 30 | IDC          | Lumpectomy | 0   | 8   | 1     | Y |

|                     |   |       |           |            |     |     |     |     |
|---------------------|---|-------|-----------|------------|-----|-----|-----|-----|
| OC                  | F | 27    | MBC       | Mastectomy | 0   | 15  | N/A | N   |
| BC                  | F | 32    | IDC       | Biopsy     | N/A | N/A | 2   | Y   |
| BC                  | F | 33    | IDC       | Lumpectomy | 11  | 15  | 3   | N   |
| BC + uterine cancer | F | 33    | IDC       | Mastectomy | 2   | 25  | 3   | Y   |
| BC                  | F | 29    | IDC       | Mastectomy | N/A | N/A | N/A | Y   |
| BC                  | F | 27    | IDC       | Lumpectomy | 1   | 15  | 3   | Y   |
| BC                  | F | 26    | IDC       | Mastectomy | N/A | N/A | 2   | N   |
| bilatBC             | F | 29    | N/A       | N/A        | N/A | N/A | N/A | Y   |
| BC                  | F | 29    | N/A       | N/A        | N/A | N/A | N/A | Y   |
| BC                  | F | 24    | IDC       | Lumpectomy | 2   | 15  | 3   | N   |
| BC                  | F | 31    | IDC       | Lumpectomy | 0   | 12  | 3   | Y   |
| BC                  | F | 33    | IDC       | Mastectomy | 1   | 21  | 3   | Y   |
| BC                  | F | 26    | IDC       | Mastectomy | 3   | 55  | 3   | Y   |
| BC                  | F | 29    | IDC       | Lumpectomy | 3   | 19  | 3   | N   |
| BC                  | F | 24    | IDC       | Lumpectomy | 0   | 20  | 3   | N/A |
| BC                  | F | 26    | IDC       | Lumpectomy | 0   | 18  | 2   | N/A |
| BC                  | F | 30    | IDC       | Mastectomy | 0   | 15  | 3   | N/A |
| BC                  | F | 26    | IDC       | Lumpectomy | 4   | 20  | 2   | N   |
| BC                  | F | 30    | IDC       | Lumpectomy | 0   | 5   | 2   | Y   |
| BC                  | F | 35    | IDC       | Lumpectomy | 0   | 12  | 2   | Y   |
| BC                  | F | 35    | IDC       | Lumpectomy | 1   | 19  | 2   | N   |
| BC                  | F | 35    | IDC       | Lumpectomy | 1   | 15  | 2   | N   |
| OC                  | F | 20    | IDC       | Lumpectomy | 0   | 24  | 2   | Y   |
| BC                  | F | 28    | IDC       | Mastectomy | N/A | N/A | 2   | N   |
| BC                  | F | 34    | IDC       | Lumpectomy | 0   | 9   | 1   | N   |
| BC                  | F | 34    | IDC       | Lumpectomy | 0   | 16  | 3   | Y   |
| BC                  | F | 28    | IDC       | N/A_M      | 0   | N/A | 2   | N   |
| BC                  | F | 27    | IDC       | Mastectomy | 4   | 16  | 3   | Y   |
| BC                  | F | 25    | Carcinoma | Lumpectomy | N/A | N/A | N/A | Y   |
| BC/Prostata         | M | 60/61 | IDC       | N/A        | N/A | 14  | 2   | Y   |
| BC                  | M | 68    | N/A       | N/A        | N/A | N/A | N/A | N   |
| BC                  | M | 68?   | N/A       | N/A        | N/A | N/A | N/A | N/A |
| BC                  | M | 37    | N/A       | N/A        | N/A | N/A | N/A | N/A |
| BC                  | M | 62    | N/A       | N/A        | N/A | N/A | N/A | N   |

BC; breast cancer; OC; ovarian cancer; F=female; M=male; N=no; Y=yes; IDC=invasive ductal carcinoma; ILC= invasive lobular carcinoma; MBC= metaplastic breast carcinoma; N/A=non-applicable or missing data

**Supplemental Table 2. International cohort data.**

| Nucleotide (HGVS) | Protein (HGVS) | Exon | Complexo<br>group | AF (%) |
|-------------------|----------------|------|-------------------|--------|
| c.553C>T          | p.Arg185*      | 8    | 1                 | 0.049  |
| c.592G>A          | p.Val198Met    | 8    | 1                 | 0.049  |
| c.800A>G          | p.Glu267Gly    | 10   | 2                 | 0.099  |
| c.814C>G          | p.Gln272Glu    | 11   | 1                 | 0.049  |
| c.992G>C          | p.Gly331Ala    | 12   | 1                 | 0.049  |
| c.1055A>C         | p.Gln352Pro    | 12   | 1                 | 0.049  |
| c.1105A>G         | p.Ile369Val    | 12   | 1                 | 0.049  |
| c.1115T>G         | p.Leu372*      | 12   | 1                 | 0.049  |
| c.1242A>T         | p.Glu414Asp    | 12   | 1                 | 0.049  |
| c.1367A>G         | p.His456Arg    | 12   | 1                 | 0.049  |
| c.1632G>A         | p.Thr544Thr    | 12   | 3                 | 0.148  |
| c.1656G>T         | p.Glu552Asp    | 12   | 1                 | 0.049  |
| c.1928A>C         | p.Gln643Pro    | 13   | 2                 | 0.099  |
| c.2146G>A         | p.Glu716Lys    | 16   | 1                 | 0.049  |
| c.2410_2412delGAG | p.Glu804del    | 18   | 2                 | 0.099  |
| c.2516G>A         | p.Arg839Gln    | 19   | 1                 | 0.049  |
| c.2630G>A         | p.Arg877His    | 20   | 1                 | 0.049  |

Rare *RBBP8*-variants and allele frequencies (AF) in the international cohort (n=1054).

**Supplementary Table 3.** *RBBP8* variants in COMPLEXO cohort were analysed for micronuclei formation after irradiation or Hydroxyurea treatment as described before. Variants such as H456R, Q643P, E804del and R839Q were found in both the COMPLEXO and Danish cohort. Damaging variants have significantly increased micronuclei formation in three independent biological repeats using One-way Anova for statistical testing. For each biological repeat 100 binucleated cells were analysed.

| <b>Classification of <i>RBBP8</i> variants in COMPLEXO cohort based on micronuclei formation after genotoxic stress</b> | <b>Micronuclei formation after IR</b>                                                              | <b>Micronuclei formation after HU</b>                                              |
|-------------------------------------------------------------------------------------------------------------------------|----------------------------------------------------------------------------------------------------|------------------------------------------------------------------------------------|
| Damaging variants                                                                                                       | R185*, L372*                                                                                       | R185*, L372*, Q643P, E804del                                                       |
| Non-damaging variants                                                                                                   | V198M, E267G, Q272E, G331A, E352P, I369V, E414D, H456R, E552D, Q643P, E716K, E804del, R839Q, R877H | V198M, E267G, Q272E, G331A, E352P, I369V, E414D, H456R, E552D, E716K, R839Q, R877H |

**Supplementary Table 4: Primer sequences for verification of identified *RBBP8* variants using Sanger sequencing**

| Nucleotide (HGVS) | Protein (HGVS) | Exon | Forward primer                       | Reverse primer                       |
|-------------------|----------------|------|--------------------------------------|--------------------------------------|
| c.298C>T          | p.R100W        | 6    | 5'-TGGTATAACATGATTCAGC               | 5'-CCATCCATTTAATTACAACC              |
| c.329G>A          | p.R110Q        | 6    | 5'-TTGATTTTCACAGTATTTGC              | 5'-TATTTCTTACTAAATTAAGC              |
| c.693T>A          | p.S231R        | 9    | 5'-<br>TGTTTCTTAGTGAAATTAAGGAG<br>C  | 5'-<br>GATTAGGGATATTTATATGAATAGG     |
| c.1367A>G         | p.H456R        | 12   | 5'-TCAAAATCTGAAGATAGTGC              | 5'-CCTCATAAAGAGTCACTTGC              |
| c.1505G>T         | p.R502L        | 12   | 5'-CACTGATAAACATTTGGAGC              | 5'-CAAGGGCTGAAGGATGATGC              |
| c.1928A>C         | p.Q643P        | 13   | 5'-CATGGAGGATGTGAACTTGCA             | 5'-ACCGGTAAAATGTGAGAATCGT            |
| c.2024C>T         | p.T675I        | 14   | 5'-TGTCTATTTAGATCCTTTGC              | 5'-TACATGTAGGTTTTAAGACG              |
| c.2131G>A         | p.E711K        | 15   | 5'-<br>TCCTTGGCAGCAGTCCTTCTTTTC<br>C | 5'-<br>ACTGAAACTGAGCTTTCCTAAGAG<br>G |
| c.2410_2412del    | p.E804del      | 18   | 5'-<br>GGGGATTATTTCTCCTCTGAACTC      | 5'-<br>TGTTACGCCTGGCTCAAATAAGAG      |
| c.2413A>G         | p.R805G        | 18   | 5'-GGGGATTACACTGAATTTGC              | 5'-TAGTAGAGATGGGGTTTCGC              |
| c.2516G>A         | p.R839Q        | 19   | 5'-CTTCACAGACCAACATCAGC              | 5'-GCACAATCTTGGCTCACTGC              |
| c.2620C>G         | p.P874A        | 20   | 5'-AATCATCAGCATCACACAGC              | 5'-GCGCCTTATTGTTTTAAAGG              |
| c.2682G>C         | p.E894D        | 20   | 5'-AATCATCAGCATCACACAGC              | 5'-GCGCCTTATTGTTTTAAAGG              |

## **Supplementary Acknowledgment**

We thank the Complexo network for data access and advice. The Complexo network consists of: Melissa Southey, The University of Melbourne; Tu Nguyen-Dumont, Monash University; Ian Campbell, Peter MacCallum Cancer Centre; Georgia Trench, QIMR Berghofer Medical Research Institute; David Goldgar, Health University of Utah; Douglas Easton, University of Cambridge; Peter Devilee, LUMC, Leiden University Medical Centre; Katherine L. Nathanson, Perelman Center for Advanced Medicine; Kenneth Offit, Memorial Sloan Kettering Cancer Center; Jeffrey Weitzel, Clinical Cancer Genomics; Peter Kraft, Harvard T.H. Chan School of Public Health; Lesueur Fabienne, Institut Curie; Paolo Peterlongo, IFOM, The FIRC Institute of Molecular Oncology; Bernardo Bonanni, Division of Cancer Prevention and Genetics, IEO, European Institute of Oncology IRCCS Milan, 20141, Italy; Teo Soo Hwang, University of Cambridge; Antoinette Hollestelle, Erasmus MC Cancer Institute; Dörk Thilo, MHH, Medizinische Hochschule Hannover; Rita Schmutzler, Eric Hahnen, Center for Hereditary Breast and Ovarian Cancer, University of Cologne, Faculty of Medicine and University Hospital Cologne, Cologne, Germany; Susan Neuhausen, Beckman Research Institute; Barbara Burnwinkel, German Cancer Research Center.
